# Supplementary material
Source: Springer Nature journal article supplement (https://www.springermedizin.de/resource/supplementary/12962_2007_90_MOESM2_ESM.pdf/9572170)

High

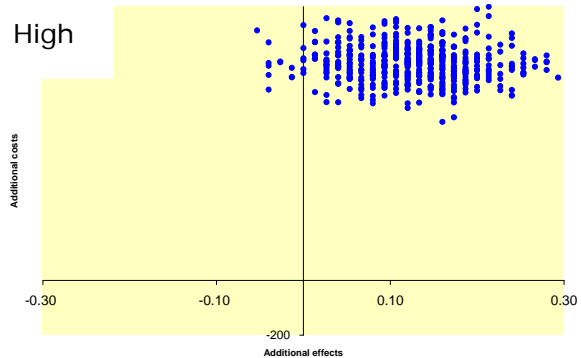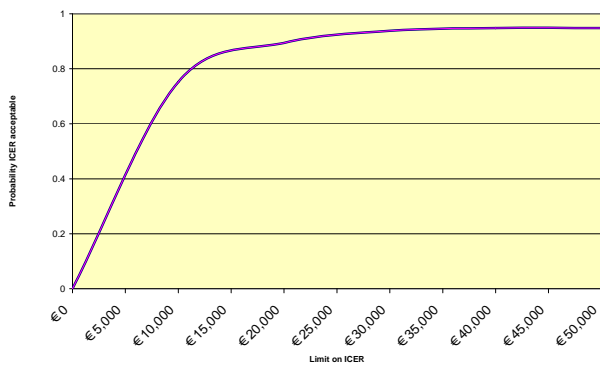

Medium

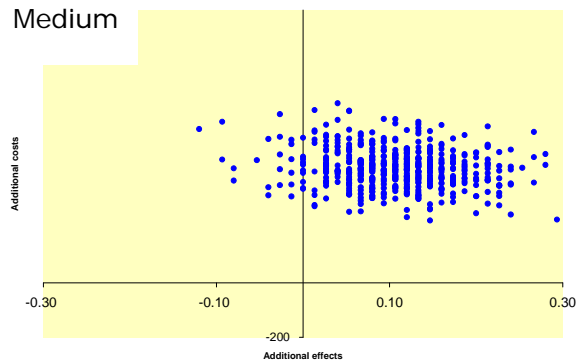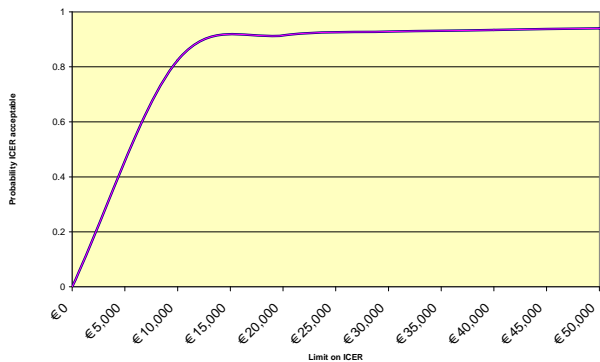

Low

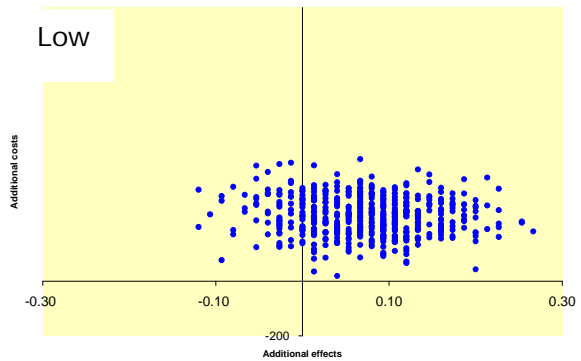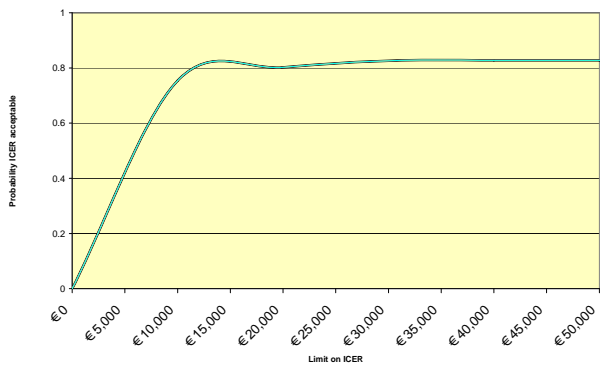

Supplement: MOESM2 [file 9572170]
